# Supplementary material
Source: PubMed Central journal article supplement (PMC3987681)

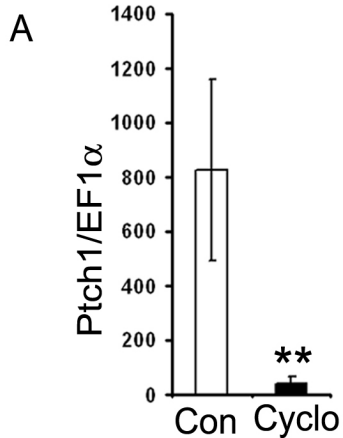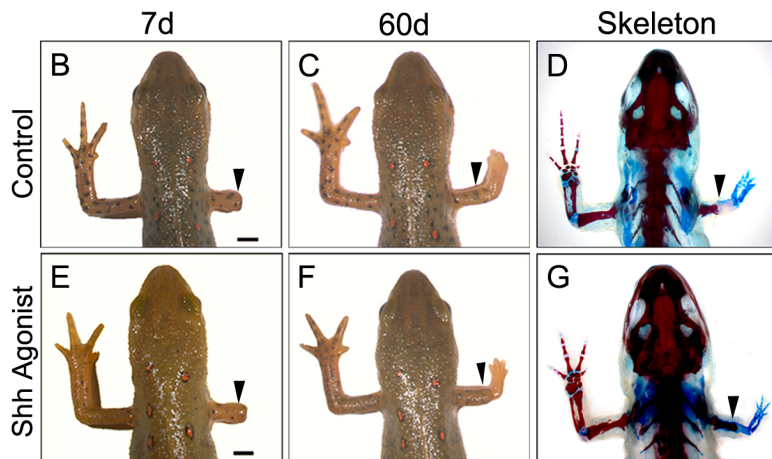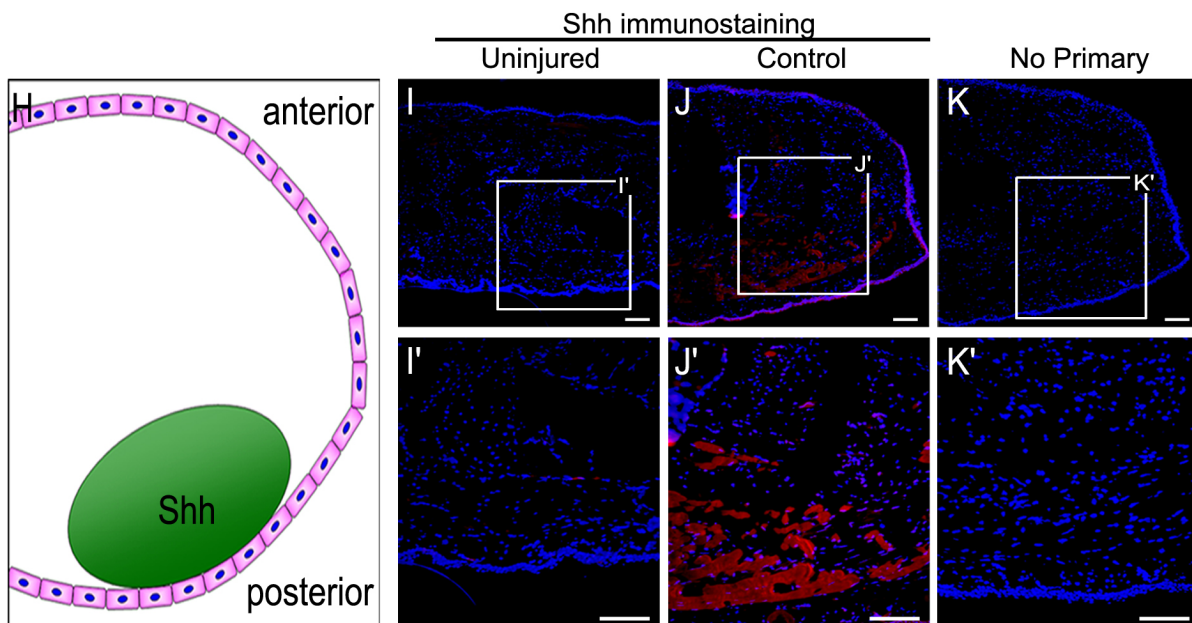

Supplement: NIHMS401226-supplement-01.pdf [file NIHMS401226-supplement-01.pdf]

Singh et al., Supplemental Figure S2

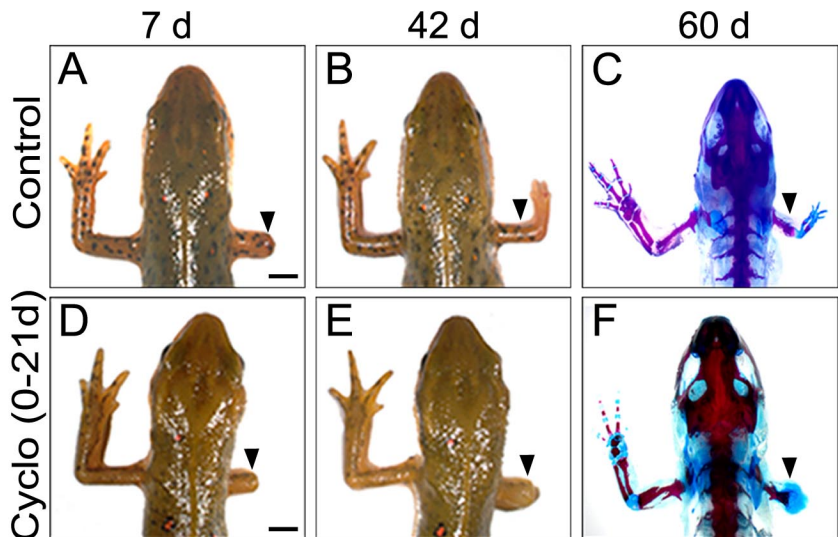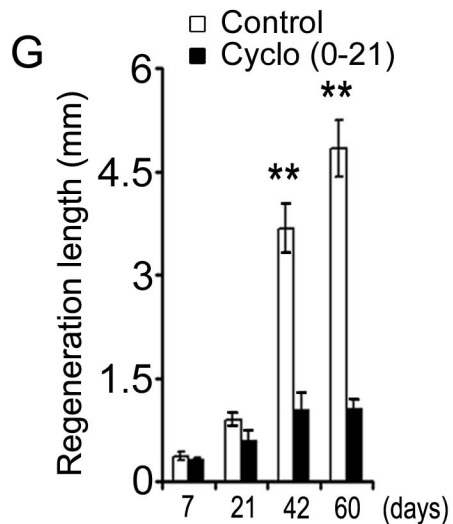

Supplement: NIHMS401226-supplement-02.pdf [file NIHMS401226-supplement-02.pdf]

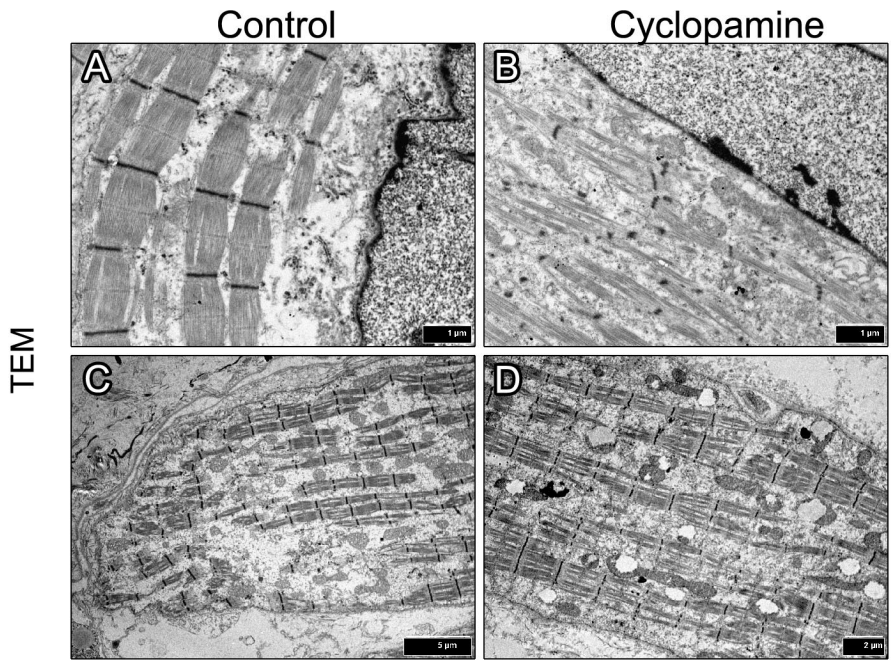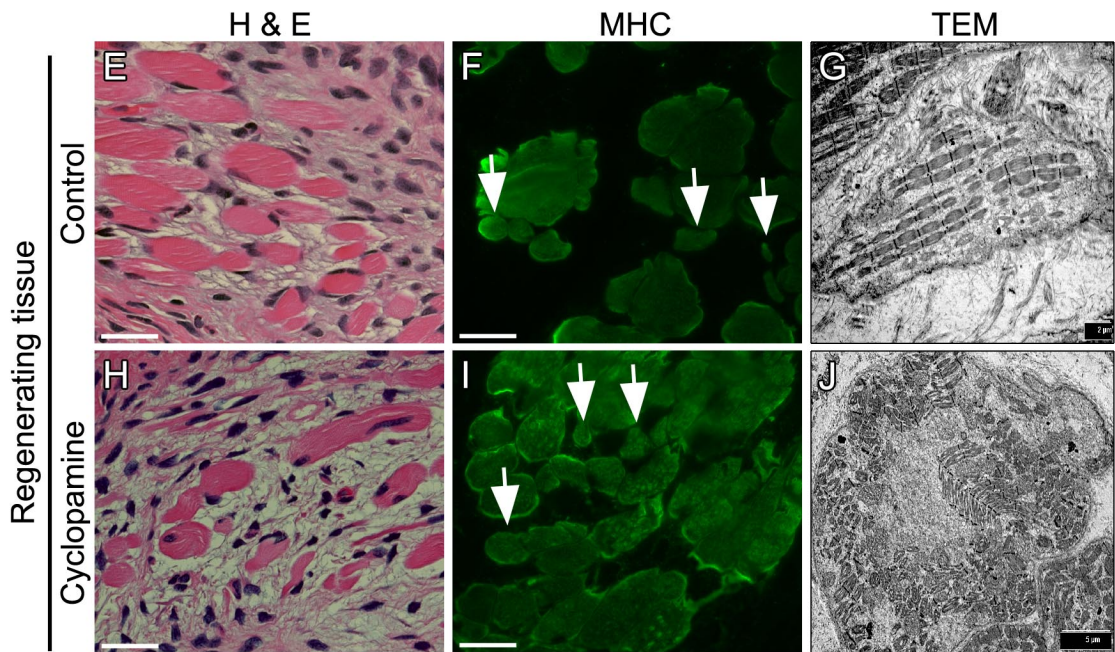

Supplement: NIHMS401226-supplement-03.pdf [file NIHMS401226-supplement-03.pdf]

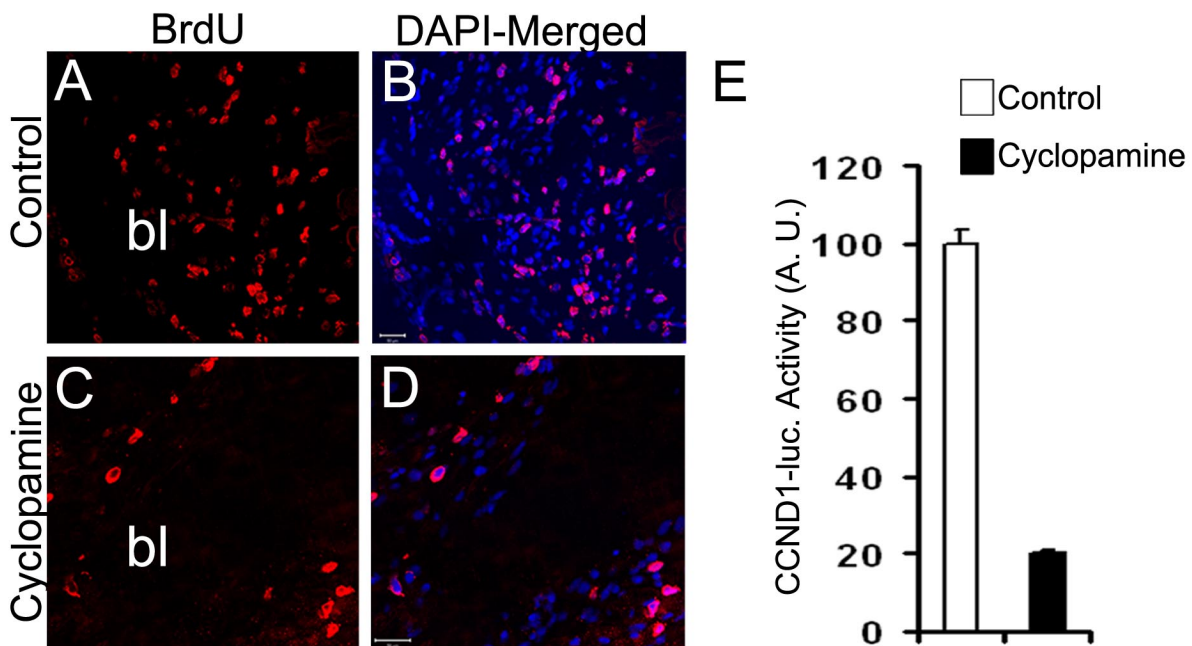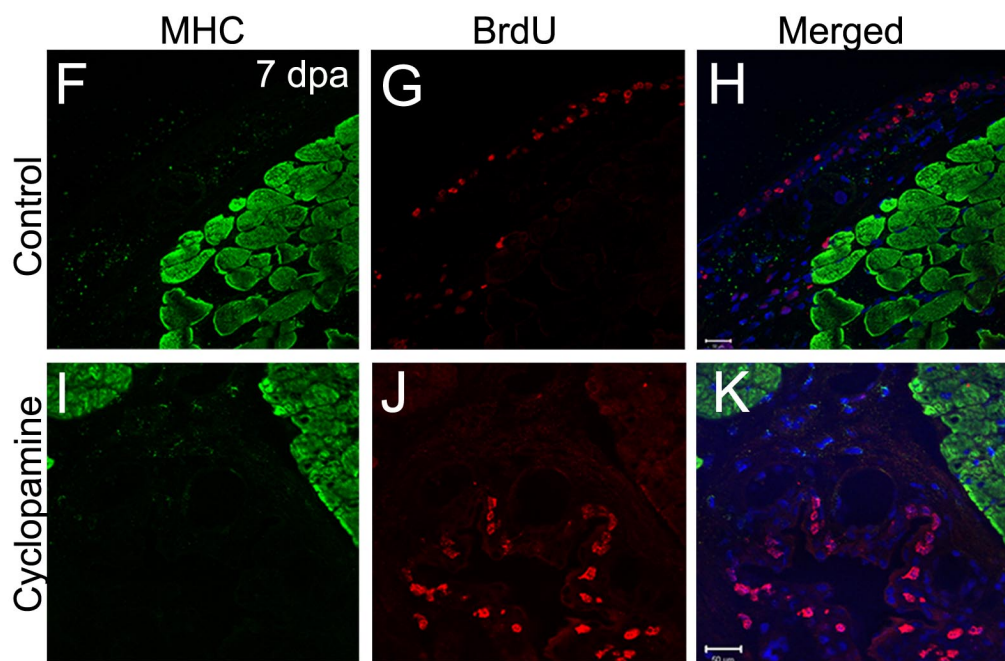

Supplement: NIHMS401226-supplement-04.pdf [file NIHMS401226-supplement-04.pdf]

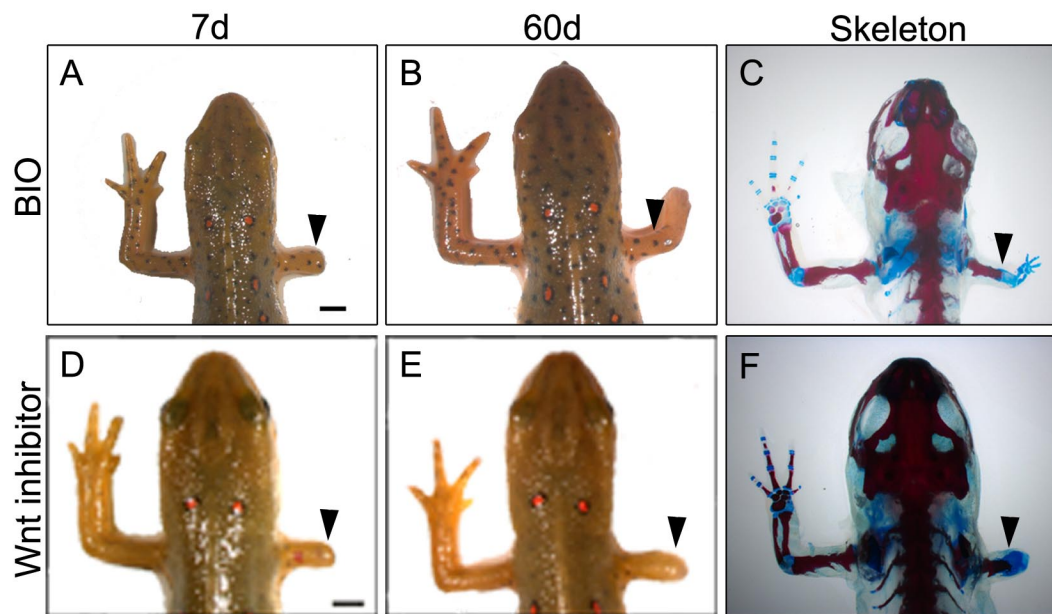

Regenerating tissue

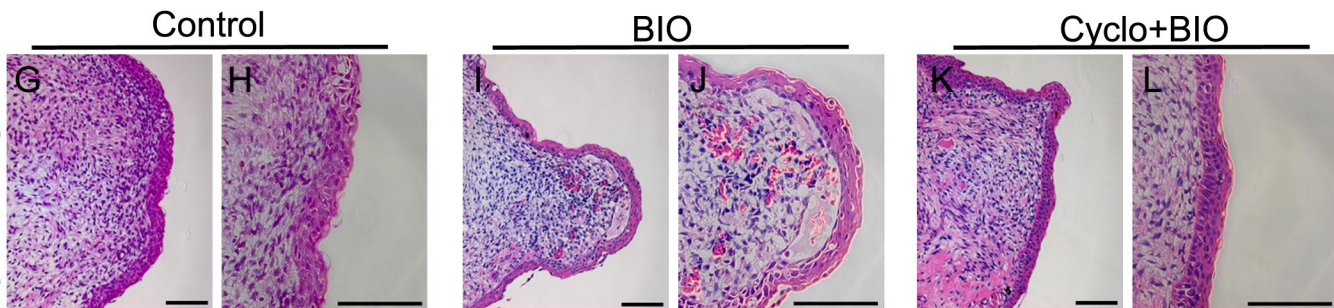

Supplement: NIHMS401226-supplement-05.pdf [file NIHMS401226-supplement-05.pdf]
